# Supplementary material
Source: HighWire-hosted journal article supplement (https://fg.bmj.com/highwire/filestream/144552/field_highwire_adjunct_files/0/flgastro-2022-102181supp001_data_supplement.pdf)
Supplement: flgastro-2022-102181supp001_data_supplement.pdf [file flgastro-2022-102181supp001_data_supplement.pdf]

**Supplementary File 1: QR Codes**

The use of QR codes is an easy way to quickly access online materials. QR codes can be put on posters, e.g. put on the walls in hospitals/clinics, emailed to families or included on patient information booklets or leaflets. Here are some QR codes for linking to our gastrostomy resources to support families.

**QR code for website with resources and videos for families on gastrostomy care**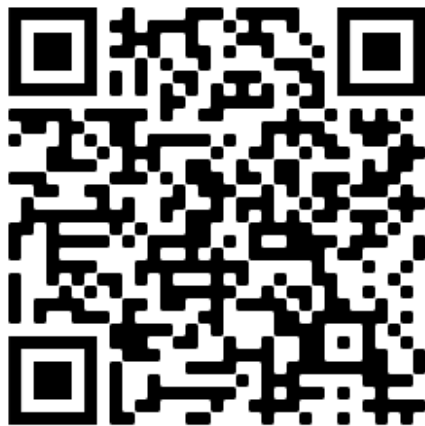**QR code for YouTube playlist for gastrostomy videos**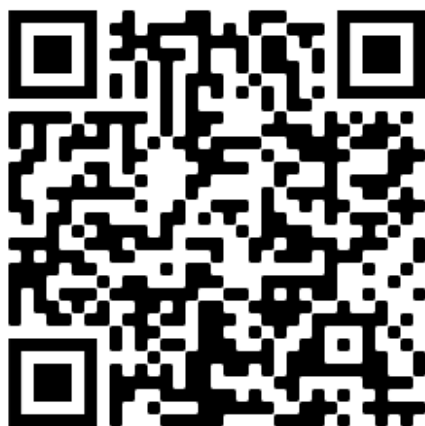

\*QR codes can be easily generated online for free to direct people to specific videos as needed.
